# Supplementary material
Source: PubMed Central journal article supplement (PMC8788682)
Supplement: aem.01645-21-s0001.pdf [file aem.01645-21-s0001.pdf]

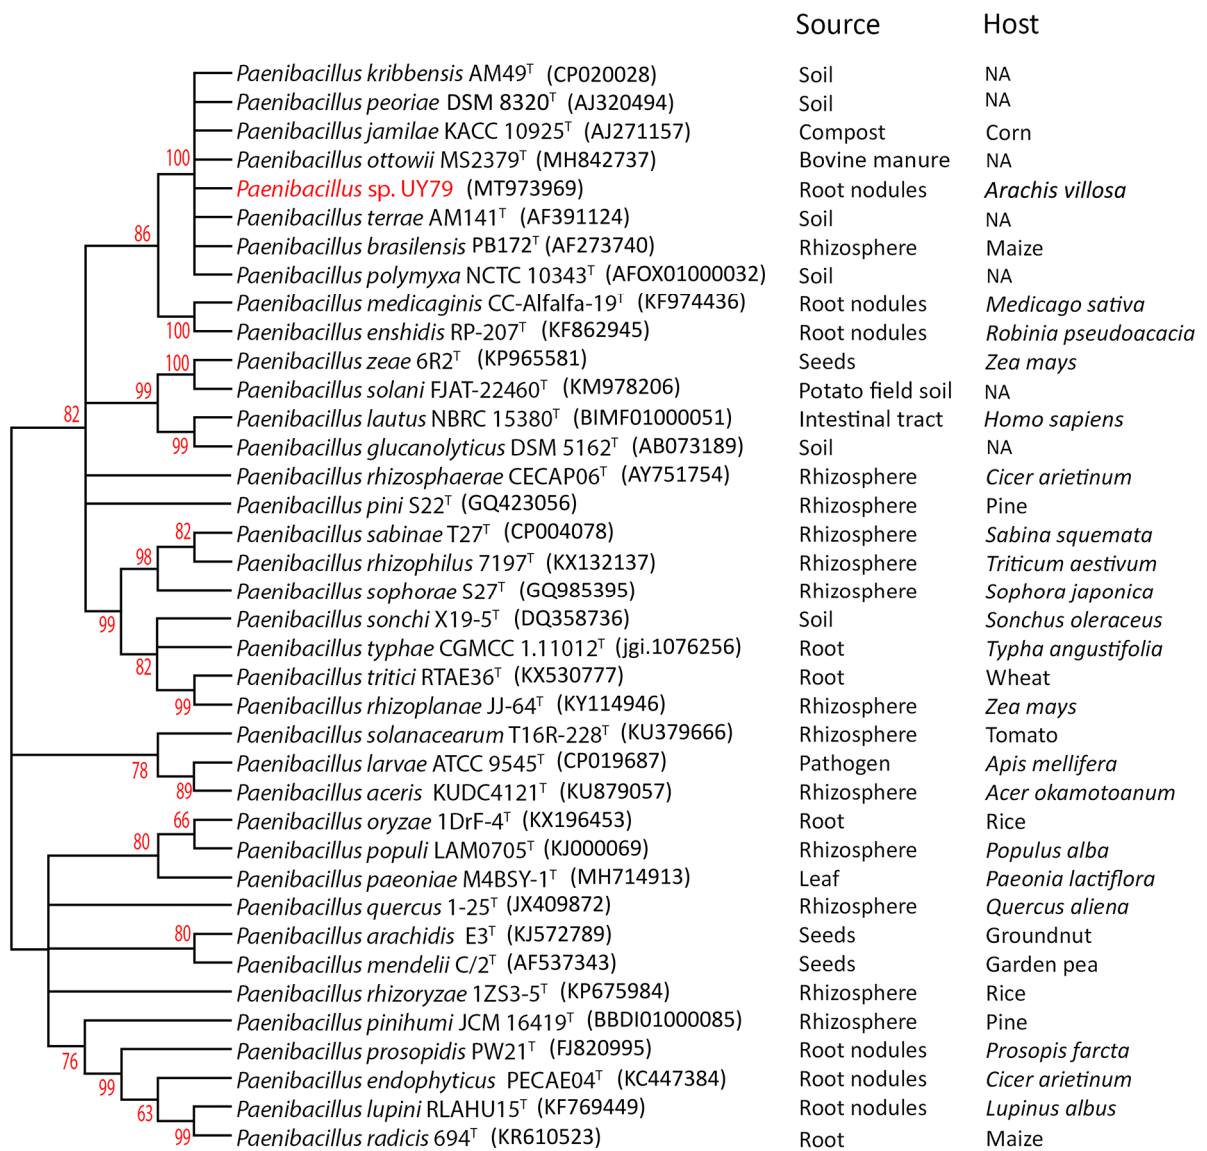

1

2 **Fig. S1.** Phylogenetic affiliation of the almost entire (1241 positions) 16S rRNA gene sequence

3 of *Paenibacillus* sp. strain UY79 relative to *Paenibacillus* spp., isolated from soil, rhizosphere

4 or different plant compartments (root nodule, root, leaf, seed). Sequences of *P. larvae* ATCC

5 9545 (a pathogen of *Apis mellifera*) and *P. lautus* NBRC15380 (a human pathogen) were also

6 included in the analysis. The tree was constructed using MEGA X program. The evolutionary

7 history was inferred by using the Maximum Likelihood method and Kimura 2-parameter

8 model (1). Numbers at each node represent percentage of bootstrap replications calculated

9 from 1,000 replicate trees (2). Branches corresponding to partitions reproduced in less than

10 60% bootstrap replicates were collapsed. Strain UY79 is shown in red, type strains are

11 indicated with a superscript T and NCBI accession numbers are shown in parentheses.

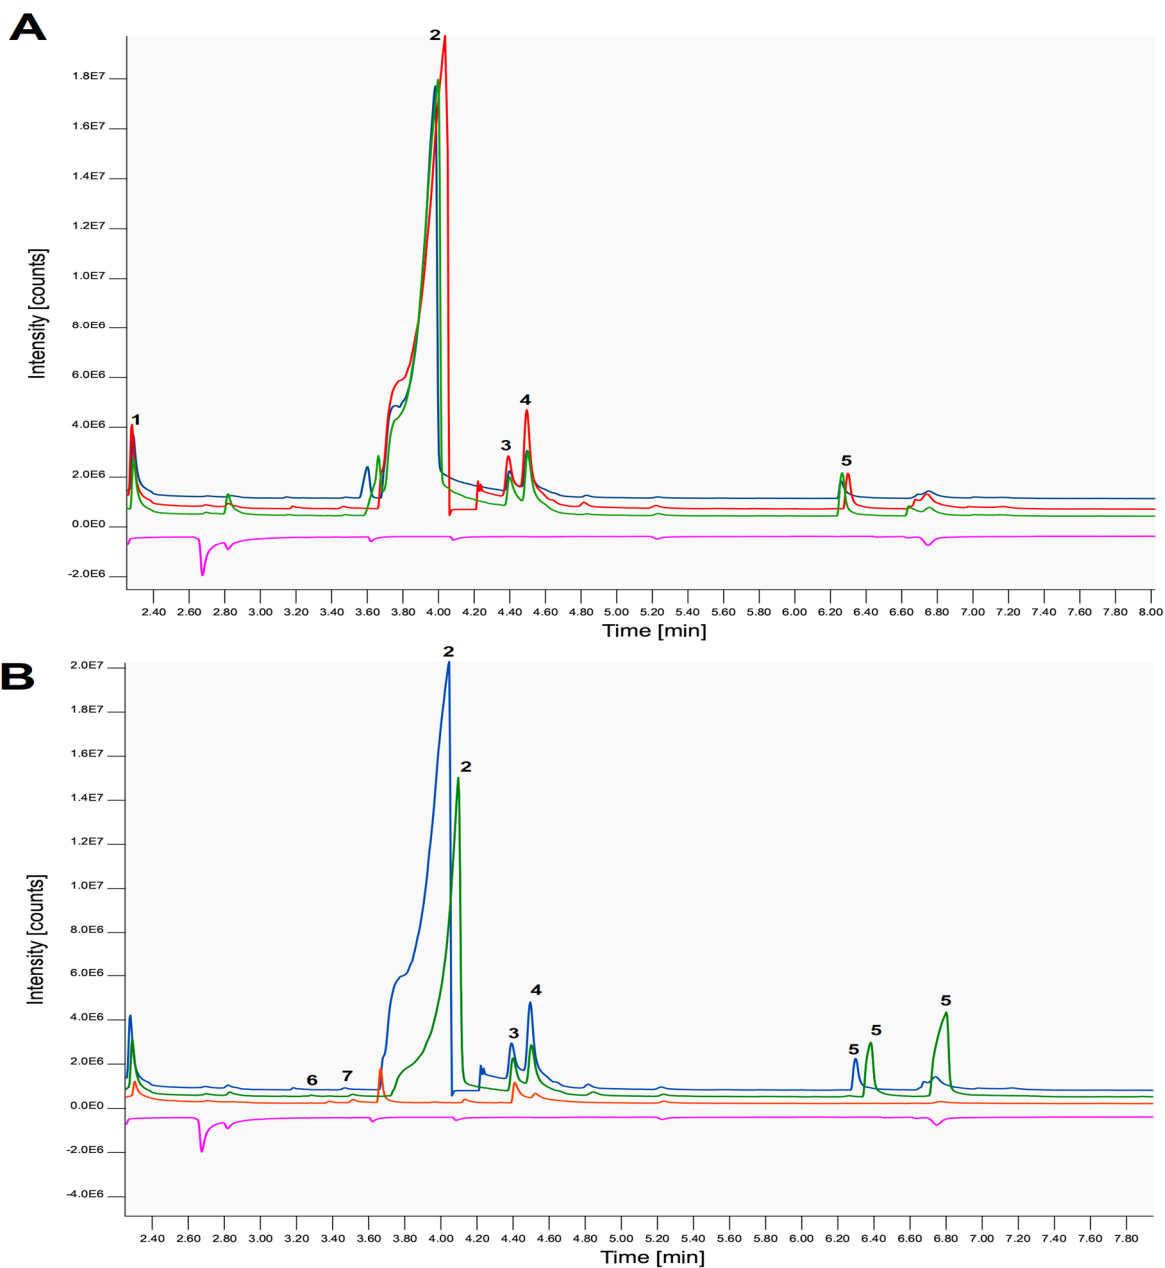

12

13 **Fig. S2.** SPME-GC-MS chromatograms. (A) Chromatograms of VCs produced by a 7-day culture  
 14 of UY79, collected by 30 min exposure to SPEM (red) or 10 min exposure to SPEM (blue); by a  
 15 36h culture of UY79 and 30min exposure to SPEM (green); and by PDA medium after 7 days  
 16 of incubation and 30 min exposure to SPEM (fuchsia). (B) Chromatograms of VCs produced at  
 17 7 days and 30-min exposure to SPEM by UY79 (blue), *S. rolfsii* 1948 (red), UY79 faced to *S.*  
 18 *rolfsii* 1948 (green) and PDA medium (fuchsia). Identification of peaks depicted in the figure  
 19 correspond to: (1) 2-methyl-1-propanol, (2) 3-hydroxy-2-butanone, (3) 3-methyl-1-butanol,  
 20 (4) 2-methyl-1-butanol, (5) 2,3-butanediol, (6) 2-ethylfuran and (7) 2,5-dimethylfuran.

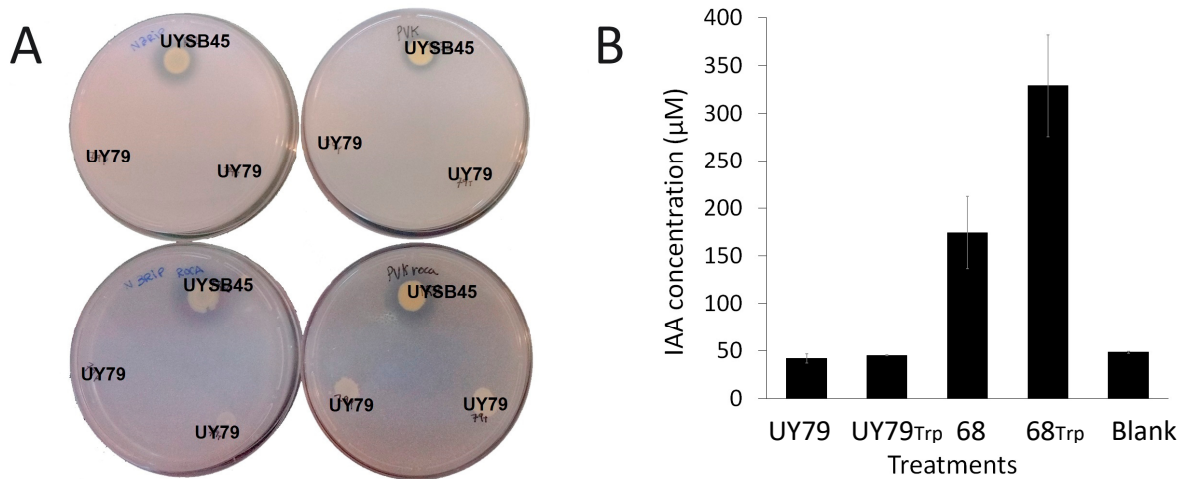

21

22 **Fig. S3.** *In vitro* evaluation of plant-growth promotion traits of *Paenibacillus* sp. strain UY79.

23 **A)** Phosphate solubilization was visualized as a clear halo around colonies grown in NBRIP (left)  
 24 or PVK (right) medium. Phosphate was supplied as  $(\text{PO}_4)_2\text{Ca}_3$  (upper plates) or as rock  
 25 phosphate (bottom plates). *Pantoea* sp. strain UYSB45 was used as positive control. **B)** IAA  
 26 production was assessed colorimetrically using the Salkowski reagent. *Microbacterium* sp.  
 27 strain UYFA68 (abbreviated as 68) was used as a positive control. Strain UY79 is abbreviated  
 28 as 79. Conditions with the addition of tryptophan are indicated as Trp. Medium without  
 29 bacteria was used as a negative control (Blank)

30

31

32

33

34

35

36

37

38

39

40

41

42

43

44

45

46

47

|  |                     | Strain                               | Phenotype    |               |
|--|---------------------|--------------------------------------|--------------|---------------|
|  |                     |                                      | TY<br>medium | TSA<br>medium |
|  |                     | <i>B. elkanii</i> U-1301             | I            | nd            |
|  | Coexistence<br>(Co) | <i>B. elkanii</i> U-1302             | I            | nd            |
|  |                     | <i>E. meliloti</i> 1021              | Co           | nd            |
|  | Inhibition<br>(I)   | <i>R. tropici</i> CIAT 899           | Co           | nd            |
|  |                     | <i>C. necator</i> . UYPR2.512        | Co           | II            |
|  |                     | <i>Paraburkholderia</i> sp. UYPR4.13 | nd           | Co            |
|  | Inhibition<br>(II)  | <i>P. protegenes</i> Pf-5            | NG           | NG            |
|  |                     | <i>P. fluorescens</i> UP61           | nd           | NG            |
|  | Inhibition<br>(I)   | <i>P. fluorescens</i> U148           | nd           | NG            |
|  |                     | <i>A. brasilense</i> SP7             | III          | III           |
|  |                     | <i>Streptomyces</i> sp. UYFA 156     | nd           | III           |
|  | Inhibition<br>(IV)  | <i>E. caratovora</i> SCC3193         | Co           | nd            |
|  |                     | <i>B. subtilis</i> ATCC 6633         | IV           | Co            |

48

49

50

51

52

53

54

55

56

57

58

**Fig. S4.** Evaluation of antibiosis by UY79 strain against different soil bacteria. Antibiosis was analyzed by using the soft-agar overlay assay. The assay was performed twice. Different types of bacterial interactions were observed. Examples of the interaction exerted and their classification are depicted in the pictures: coexistence (Co), growth of both strains was observed and no halo of inhibition was visualized; inhibition I (I), inhibition halo around the drop of UY79 culture and moderate growth of UY79; inhibition (II), inhibition halo around the drop of UY79 and poor growth of UY79; inhibition (III) good growth of UY79 and inhibition halo in the drop; inhibition (IV), good growth of UY79 and inhibition halo around the drop of UY79 culture. NG, no visible growth of UY79; nd, not done.

59 **Table S1.** Genome statistics for *Paenibacillus* sp. strain UY79

| Attribute                         | Value           | Bioinformatic tool used        |
|-----------------------------------|-----------------|--------------------------------|
| Genome size (bp)                  | 4970505         | Quast v5.0.2                   |
| N° of clean reads                 | 12720648        | FastQC                         |
| N° of contigs                     | 167             | Quast v5.0.2                   |
| N <sub>50</sub> (bp)              | 281104          | Quast v5.0.2                   |
| L <sub>50</sub> (bp)              | 5               | Quast v5.0.2                   |
| Maximum contig length (bp)        | 1146979         | Quast v5.0.2                   |
| Minimum contig length (bp)        | 71              | Quast v5.0.2                   |
| Avg genome coverage (X)           | 235.7           | Bowtie2, Samtools,<br>Bedtools |
| G+C content (%)                   | 46.4            | Quast v5.0.2                   |
| No. of predicted coding sequences | 5353            | RAST 2.0                       |
| RNA genes                         | 109             | RAST 2.0                       |
| Plasmid                           | 1               | PlasFlow                       |
| Plasmid size (bp)                 | 42743           | RAST 2.0                       |
| GenBank accession n°              | JAFFQR010000000 |                                |
| SRA accession n°                  | PRJNA697992     |                                |

60

61

62 **Table S2.** Relevant VCs produced by *Paenibacillus* sp. strain UY79 grown alone. VCs were  
 63 collected from bacterial cultures grown for 36 h or for 7 days and extracted for 10 minutes  
 64 or 30 minutes sorption to SPEM fibers

| Compound <sup>a</sup> | RT <sup>b</sup>      |         |         | Area (%) |         |         |
|-----------------------|----------------------|---------|---------|----------|---------|---------|
|                       | 36 h                 | 7 d     | 7 d     | 36 h     | 7 d     | 7 d     |
|                       | (30min) <sup>c</sup> | (10min) | (30min) | (30min)  | (10min) | (30min) |
| 2-methyl-1-propanol   | 2.283                | 2.281   | 2.274   | 1.77     | 2.51    | 1.70    |
| 3-hydroxy-2-butanone  | 3.995                | 3.752   | 4.043   | 70.38    | 76.25   | >65     |
| 3-methyl-1-butanol    | 4.399                | 4.398   | 4.391   | 1.11     | 0.90    | 2.66    |
| 2-methyl-1-butanol    | 4.501                | 4.497   | 4.495   | 4.40     | 4.33    | 5.31    |
| 2,3-butanediol        | 6.268                | 6.262   | 6.301   | 1.71     | 1.06    | 1.14    |

65 <sup>a</sup> Compounds were identified by comparison of the mass spectra against reference libraries  
 66 (NIST 08, Wiley 139)

67 <sup>b</sup> RT: Retention time

68 <sup>c</sup> VCs were collected from bacterial cultures grown for 36 h or 7 days and extracted for 10 or  
 69 30 minutes with SPEM fibers

70

71 **Table S3.** Proteins or genes of interest for this work mined in the genome of *Paenibacillus* sp.  
 72 strain UY79

| Putative activity         | Predicted function                                              | RAST ID   | Tool used for mining |
|---------------------------|-----------------------------------------------------------------|-----------|----------------------|
| Cellulase activity        |                                                                 |           |                      |
|                           | Cellulose 1,4-beta-cellobiosidase (reducing end) (EC 3.2.1.176) | UY79_2001 | RAST                 |
|                           | Cellulose 1,4-beta-cellobiosidase (reducing end) (EC 3.2.1.176) | UY79_4217 | RAST                 |
|                           | Endo-1,4-beta-glucanase (cellulase) (EC 3.2.1.4)                | UY79_2748 | RAST                 |
|                           | Endo-1,4-beta-glucanase E1precursor (EC 3.2.1.4)                | UY79_2705 | RAST                 |
|                           | Endo-1,4-beta-glucanase B precursor (EC 3.2.1.4)                | UY79_948  | RAST                 |
|                           | Endoglucanase                                                   | UY79_2712 | RAST                 |
|                           | Endo-beta-1,3-1,4 glucanase (licheninase) (EC 3.2.1.73)         | UY79_916  | RAST                 |
| Beta-glucosidase activity |                                                                 |           |                      |
|                           | Beta-glucosidase (EC 3.2.1.21)                                  | UY79_4825 | RAST                 |
|                           | Beta-glucosidase (EC 3.2.1.21)                                  | UY79_1789 | RAST                 |
|                           | Beta-glucosidase (EC 3.2.1.21)                                  | UY79_1150 | RAST                 |

## Chitinase activity

|                         |           |      |
|-------------------------|-----------|------|
| Chitinase (EC 3.2.1.14) | UY79_3954 | RAST |
|-------------------------|-----------|------|

|                        |           |      |
|------------------------|-----------|------|
| Chitin binding protein | UY79_1619 | RAST |
|------------------------|-----------|------|

## Xylanase activity

|                                                 |           |      |
|-------------------------------------------------|-----------|------|
| Endo-1,4-beta-xylanase A precursor (EC 3.2.1.8) | UY79_5258 | RAST |
|-------------------------------------------------|-----------|------|

|                                                 |           |      |
|-------------------------------------------------|-----------|------|
| Endo-1,4-beta-xylanase A precursor (EC 3.2.1.8) | UY79_5194 | RAST |
|-------------------------------------------------|-----------|------|

|                                     |           |      |
|-------------------------------------|-----------|------|
| Endo-1,4-beta-xylanase (EC 3.2.1.8) | UY79_5111 | RAST |
|-------------------------------------|-----------|------|

|                                     |           |      |
|-------------------------------------|-----------|------|
| Endo-1,4-beta-xylanase (EC 3.2.1.8) | UY79_3919 | RAST |
|-------------------------------------|-----------|------|

|                                                 |           |      |
|-------------------------------------------------|-----------|------|
| Endo-1,4-beta-xylanase A precursor (EC 3.2.1.8) | UY79_3218 | RAST |
|-------------------------------------------------|-----------|------|

|                                                 |           |      |
|-------------------------------------------------|-----------|------|
| Endo-1,4-beta-xylanase A precursor (EC 3.2.1.8) | UY79_3217 | RAST |
|-------------------------------------------------|-----------|------|

|                                     |           |      |
|-------------------------------------|-----------|------|
| Endo-1,4-beta-xylanase (EC 3.2.1.8) | UY79_3987 | RAST |
|-------------------------------------|-----------|------|

|                                                 |           |      |
|-------------------------------------------------|-----------|------|
| Endo-1,4-beta-xylanase A precursor (EC 3.2.1.8) | UY79_2728 | RAST |
|-------------------------------------------------|-----------|------|

|                                                 |           |      |
|-------------------------------------------------|-----------|------|
| Endo-1,4-beta-xylanase A precursor (EC 3.2.1.8) | UY79_2727 | RAST |
|-------------------------------------------------|-----------|------|

|                                                 |           |      |
|-------------------------------------------------|-----------|------|
| Endo-1,4-beta-xylanase A precursor (EC 3.2.1.8) | UY79_2726 | RAST |
|-------------------------------------------------|-----------|------|



|                                                |           |                    |
|------------------------------------------------|-----------|--------------------|
| Endo-1,4-beta-xylanase (EC 3.2.1.8)            | UY79_203  | RAST               |
| Endo-1,4-beta-xylanase (EC 3.2.1.8)            | UY79_178  | RAST               |
| Endo-1,4-beta-xylanase (EC 3.2.1.8)            | UY79_907  | RAST               |
| Xylan 1,4-beta-xylosidase (EC 3.2.1.37)        | UY79_1887 | RAST               |
| Xylan 1,4-beta-xylosidase (EC 3.2.1.37)        | UY79_135  | RAST               |
| Xylan alpha-1,2-glucuronosidase (EC 3.2.1.131) | UY79_134  | RAST               |
| Protease                                       |           |                    |
| Bacillopeptidase F                             | UY79_2733 | RAST               |
| HCN production                                 | NOT FOUND |                    |
| NRPS                                           |           |                    |
| NRPS: Tridecaptin                              | UY79_5164 | RAST,<br>antiSMASH |
|                                                | UY79_5163 | RAST,<br>antiSMASH |
| NRPS-like                                      | UY79_3034 | RAST,<br>antiSMASH |
| NRPS                                           | UY79_2567 | RAST,<br>antiSMASH |
|                                                | UY79_2566 | RAST,<br>antiSMASH |

|                                                          |           |                    |
|----------------------------------------------------------|-----------|--------------------|
| NRPS: Fusaricidin B                                      | UY79_2178 | RAST,<br>antiSMASH |
|                                                          | UY79_2177 | RAST,<br>antiSMASH |
| NRPS: Tridecaptin                                        | UY79_2096 | RAST,<br>antiSMASH |
|                                                          | UY79_2094 | RAST,<br>antiSMASH |
|                                                          | UY79_2093 | RAST,<br>antiSMASH |
| NRPS                                                     | UY79_1857 | RAST,<br>antiSMASH |
| Lasso peptide Paeninodin                                 | UY79_3797 | antiSMASH          |
| Nitrogen fixation                                        |           |                    |
| Nitrogenase iron protein, NifH                           | NOT FOUND |                    |
| Auxin production                                         |           |                    |
| Indole acetic acid synthesis                             | NOT FOUND |                    |
| Phosphate solubilization                                 |           |                    |
| Alkaline phosphatase (EC 3.1.3.1)                        | UY79_2289 | RAST               |
| Siderophore biosynthesis and iron/ siderophore transport |           |                    |

|                                                                                                |           |                    |
|------------------------------------------------------------------------------------------------|-----------|--------------------|
| ABC transporter<br>(iron/B12/siderophore/hemin), PBP                                           | UY79_5210 | RAST               |
| Siderophore biosynthesis diaminobutyrate--<br>2-oxoglutarate aminotransferase (EC<br>2.6.1.76) | UY79_5202 | RAST,<br>antiSMASH |
| PF06276.12 (Ferric iron reductase FhuF-like<br>transporter)                                    | UY79_5200 | antiSMASH          |
| Achromobactin biosynthesis protein, AcsC-<br>like                                              | UY79_5199 | RAST,<br>antiSMASH |
| Achromobactin biosynthesis protein AcsB                                                        | UY79_5198 | RAST,<br>antiSMASH |
| Diaminopimelate decarboxylase (EC 4.1.1.20)                                                    | UY79_5197 | RAST,<br>antiSMASH |
| Achromobactin biosynthesis protein AcsA @<br>Siderophore synthetase superfamily, group B       | UY79_5196 | RAST,<br>antiSMASH |
| ABC-type Fe <sup>3+</sup> -siderophore transport<br>system, PBP                                | UY79_5186 | RAST               |
| Fe-bacillibactin uptake system FeuB                                                            | UY79_5185 | RAST               |
| ABC-type Fe <sup>3+</sup> -siderophore transport<br>system, permease                           | UY79_5184 | RAST               |
| ABC-type Fe <sup>3+</sup> -siderophore transport system                                        | UY79_5183 | RAST               |

|                                                                      |           |      |
|----------------------------------------------------------------------|-----------|------|
| Ferrichrome transport ATP-binding protein<br>FhuC                    | UY79_4883 | RAST |
| Ferric uptake regulation protein Fur                                 | UY79_4700 | RAST |
| Fe-bacillibactin uptake system FeuC                                  | UY79_3500 | RAST |
| Siderophore transport protein                                        | UY79_3038 | RAST |
| Ferrichrome transport system permease<br>protein FhuB                | UY79_4121 | RAST |
| Ferrichrome transport system permease<br>protein FhuG                | UY79_4120 | RAST |
| ABC-type Fe <sup>3+</sup> -siderophore transport<br>system, permease | UY79_2524 | RAST |
| ABC-type Fe <sup>3+</sup> -siderophore transport<br>system, permease | UY79_2038 | RAST |
| Ferrous iron transport periplasmic protein<br>EfeO,                  | UY79_1725 | RAST |
| Ferrous iron transporter FeoB                                        | UY79_1175 | RAST |
| Ferrichrome-binding periplasmic protein<br>precursor (TC 3.A.1.14.3) | UY79_825  | RAST |

#### Motility

|                       |                                       |      |
|-----------------------|---------------------------------------|------|
| <i>fla/che</i> operon | UY79_2937-<br>UY79_2983,<br>UY79_3019 | RAST |
|-----------------------|---------------------------------------|------|

|                              |            |      |
|------------------------------|------------|------|
| Large flagellar gene cluster | UY79_4992- | RAST |
|------------------------------|------------|------|

|  |           |  |
|--|-----------|--|
|  | UY79_5014 |  |
|--|-----------|--|

|                            |            |      |
|----------------------------|------------|------|
| Stator operon <i>motAB</i> | UY79_5051- | RAST |
|----------------------------|------------|------|

|  |            |  |
|--|------------|--|
|  | UY79_5052, |  |
|--|------------|--|

|  |            |  |
|--|------------|--|
|  | UY79_4227- |  |
|--|------------|--|

|  |           |  |
|--|-----------|--|
|  | UY79_4228 |  |
|--|-----------|--|

#### Putative genes involved in volatile compound production

|                                      |            |      |
|--------------------------------------|------------|------|
| Acetolactate synthase (E.C. 2.2.1.6) | UY79_3438, | RAST |
|--------------------------------------|------------|------|

|  |            |  |
|--|------------|--|
|  | UY79_3439, |  |
|--|------------|--|

|  |           |  |
|--|-----------|--|
|  | UY79_5281 |  |
|--|-----------|--|

|                                       |           |                                                |
|---------------------------------------|-----------|------------------------------------------------|
| Acetoin biosynthesis (E.C. 1.1.1.304) | UY79_4819 | BLASTP,<br>HMMER, PFAM,<br>HHPRED,<br>MODELLER |
|---------------------------------------|-----------|------------------------------------------------|

|                                            |           |                                                |
|--------------------------------------------|-----------|------------------------------------------------|
| 2,3-butanediol biosynthesis (E.C. 1.1.1.4) | UY79_2598 | BLASTP,<br>HMMER, PFAM,<br>HHPRED,<br>MODELLER |
|--------------------------------------------|-----------|------------------------------------------------|

|                                                                               |           |                               |
|-------------------------------------------------------------------------------|-----------|-------------------------------|
| 2-methyl-1-butanol biosynthesis<br>(Amino acid aminotransferase E.C 2.6.1.42) | UY79_1834 | RAST, BLASTP,<br>HMMER, PFAM, |
|-------------------------------------------------------------------------------|-----------|-------------------------------|

|                                                               |           |                                                |
|---------------------------------------------------------------|-----------|------------------------------------------------|
| 2-methyl-1-butanol biosynthesis<br>(2-ketoacid decarboxylase) | UY79_2174 | BLASTP,<br>HMMER, PFAM,<br>HHPRED,<br>MODELLER |
|---------------------------------------------------------------|-----------|------------------------------------------------|

|                                                                       |                                                                 |      |
|-----------------------------------------------------------------------|-----------------------------------------------------------------|------|
| 2-methyl-1-butanol biosynthesis<br>(Alcohol dehydrogenase EC 1.1.1.1) | UY79_273,<br>UY79_705,<br>UY79_1349,<br>UY79_2626,<br>UY79_4296 | RAST |
|-----------------------------------------------------------------------|-----------------------------------------------------------------|------|

CRISPR/Cas system<sup>a</sup>

|                                                                                         |                                                                     |
|-----------------------------------------------------------------------------------------|---------------------------------------------------------------------|
| CRISPR-associated protein Cas1, Cas2, Cas3,<br>Cas4, Cas5, Csd1(Cas8c), Csd2/Csh2(Cas7) | UY79_5312,<br>UY79_1015,<br>UY79_5311,<br>UY79_5313 to<br>UY79_5317 |
|-----------------------------------------------------------------------------------------|---------------------------------------------------------------------|

|                                                              |                                                                     |
|--------------------------------------------------------------|---------------------------------------------------------------------|
| CRISPR-associated RAMP Cmr1, Cmr2; Cmr3,<br>Cmr4, Cmr5, Cmr6 | UY79_1469 to<br>UY79_1464,<br>UY79_1471,<br>UY79_1472,<br>UY79_1534 |
|--------------------------------------------------------------|---------------------------------------------------------------------|

**Phages**

|                                                                    |                           |                                                       |
|--------------------------------------------------------------------|---------------------------|-------------------------------------------------------|
| <i>Tenacibaculum</i> phage pT24 ( <i>Myoviridae</i> family)        | UY79_2931 to<br>UY79_2972 | Prophage<br>hunter (A <sup>b</sup> )                  |
| <i>Vibrio</i> phage phi2 ( <i>Myoviridae</i> family)               | UY79_383 to<br>UY79_469   | Prophage<br>hunter (A)<br>Phaster (I <sup>c</sup> )   |
| <i>Brevibacillus</i> phage Jimmer2 ( <i>Myoviridae</i> family)     | UY79_3611 to<br>UY79_3691 | Prophage<br>hunter (A)<br>Phaster (I)                 |
| <i>Bacillus</i> phage vB BtS BMBtp14 ( <i>Siphoviridae</i> family) | UY79_1908 to<br>UY79_1998 | Prophage<br>hunter (A)<br>Phaster (IN <sup>d</sup> )  |
| <i>Paenibacillus</i> phage Shelly ( <i>Siphoviridae</i> family)    | UY79_2361 to<br>UY79_2429 | Prophage<br>hunter (AM <sup>e</sup> )<br>Phaster (IN) |
| <i>Lactococcus</i> phage bIL312 ( <i>Siphoviridae</i> family)      | UY79_4988 to<br>UY79_5025 | Prophage<br>hunter (A)                                |
| <i>Paenibacillus</i> phage PG1 ( <i>Siphoviridae</i> family)       | UY79_3855 to<br>UY79_3385 | Prophage<br>hunter (AM)<br>Phaster(IN)                |
| <i>Moraxella</i> phage mcat7 ( <i>Siphoviridae</i> family)         | UY79_4609 to<br>UY79_4645 | Prophage<br>hunter (AM)                               |

---

73 <sup>a</sup> Several CRISPR related regions were detected: eighty-four CRISPR repeats and seventy-six  
74 CRISPR spacers, distributed among eight CRISPR arrays, and two CRISPR/CAS systems with

75 the following protein arrangement: Cas3-Cas5-Csd1(Cas8c)-Csd2/Csh2(Cas7)-Cas4-Cas1-  
76 Cas2, corresponding for putative Type I-C system and fCmr6-Cmr1-Cmr2-Cmr3-Cmr4-Cmr5-  
77 Cmr6, corresponding for putative Type III-B system (Table S3). Similar systems have also  
78 been described in *P. polymyxa* A18 (Type I-C and III-B), *Bacillus halodurans* (Type I-C) and  
79 *Pyrococcus furiosus* (Type III-B) (3, 4).

80 <sup>b</sup>A: active

81 <sup>c</sup>I: intact

82 <sup>d</sup>IN: incomplete

83 <sup>e</sup>AM: ambiguous



84   References

- 85   1.     Kimura M. 1980. A simple method for estimating evolutionary rates of base substitutions  
86         through comparative studies of nucleotide sequences. *Journal of Molecular Evolution*  
87         16:111-120.
- 88   2.     Felsenstein J. 1985. Confidence Limits on Phylogenies: An Approach Using the Bootstrap.  
89         *Evolution* 39:783-791.
- 90   3.     Makarova KS, Wolf YI, Iranzo J, Shmakov SA, Alkhnbashi OS, Brouns SJJ, Charpentier E, Cheng  
91         D, Haft DH, Horvath P, Moineau S, Mojica FJM, Scott D, Shah SA, Siksnyš V, Terns MP,  
92         Venclovas C, White MF, Yakunin AF, Yan W, Zhang F, Garrett RA, Backofen R, van der Oost J,  
93         Barrangou R, Koonin EV. 2020. Evolutionary classification of CRISPR-Cas systems: a burst of  
94         class 2 and derived variants. *Nat Rev Microbiol* 18:67-83.
- 95   4.     Pasari N, Gupta M, Eqbal D, Yazdani SS. 2019. Genome analysis of *Paenibacillus polymyxa*  
96         A18 gives insights into the features associated with its adaptation to the termite gut  
97         environment. *Sci Rep* 9:6091.

98
